# Supplementary material
Source: ML conference proceedings conference paper supplement (https://openreview.net/forum?id=SBoxuusTUn)

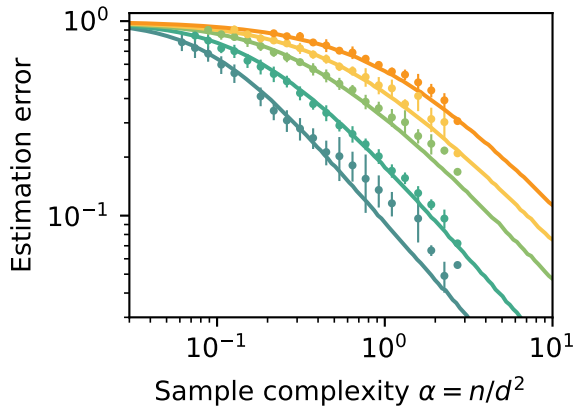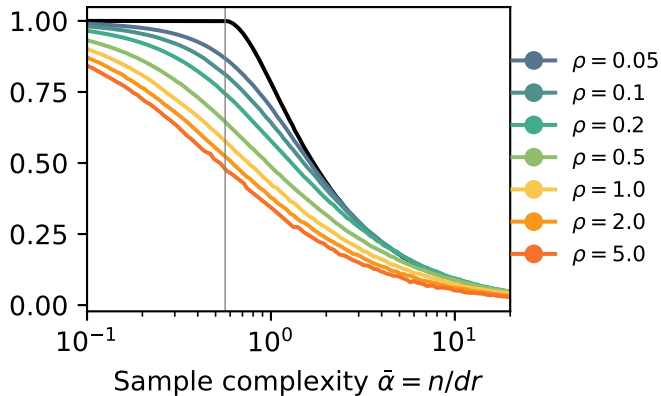

Supplement: supplementary_material [file SE_hardmax.pdf › Supplementary_NeurIPS_CameraReady/figures/SE_hardmax.pdf]
